# Supplementary material
Source: PubMed Central journal article supplement (PMC7834310)
Supplement: mmc1.pdf [file mmc1.pdf]

## Supplemental Information

### **Amplification-free detection of SARS-CoV-2 with CRISPR-Cas13a and mobile phone microscopy**

**Parinaz Fozouni, Sungmin Son, María Díaz de León Derby, Gavin J. Knott, Carley N. Gray, Michael V. D'Ambrosio, Chunyu Zhao, Neil A. Switz, G. Renuka Kumar, Stephanie I. Stephens, Daniela Boehm, Chia-Lin Tsou, Jeffrey Shu, Abdul Bhuiya, Maxim Armstrong, Andrew R. Harris, Pei-Yi Chen, Jeannette M. Osterloh, Anke Meyer-Franke, Bastian Joehnk, Keith Walcott, Anita Sil, Charles Langelier, Katherine S. Pollard, Emily D. Crawford, Andreas S. Puschnik, Maira Phelps, Amy Kistler, Joseph L. DeRisi, Jennifer A. Doudna, Daniel A. Fletcher, and Melanie Ott**

**Table S1: Related to Figures 1-4 and S1-4. List of custom oligonucleotides used in this study.**

| Oligo ID             | Type     | Source   | Description                                               | Sequence                                                    |
|----------------------|----------|----------|-----------------------------------------------------------|-------------------------------------------------------------|
| PF039_crLbu_nCoV_1   | crRNA    | Synthego | SARS-CoV-2 crRNA 1                                        | GACCACCCCAAAAAUGAAGGGGACU<br>AAAACUUUCGUGAUUUUUGGGGUCC      |
| PF040_crLbu_nCoV_2   | crRNA    | Synthego | SARS-CoV-2 crRNA 2                                        | GACCACCCCAAAAAUGAAGGGGACU<br>AAAACGGUCCACCAAACGUAAUGCG      |
| PF041_crLbu_nCoV_3   | crRNA    | Synthego | SARS-CoV-2 crRNA 3                                        | GACCACCCCAAAAAUGAAGGGGACU<br>AAAACUCUGGUUACUGCCAGUUGAA      |
| PF042_crLbu_nCoV_4   | crRNA    | Synthego | SARS-CoV-2 crRNA 4                                        | GACCACCCCAAAAAUGAAGGGGACU<br>AAAACUUUGCGGCCAAUGUUUGUAA      |
| PF043_crLbu_nCoV_5   | crRNA    | Synthego | SARS-CoV-2 crRNA 5                                        | GACCACCCCAAAAAUGAAGGGGACU<br>AAAACGAAGCGCUGGGGGCAAUUG       |
| PF044_crLbu_nCoV_6   | crRNA    | Synthego | SARS-CoV-2 crRNA 6                                        | GACCACCCCAAAAAUGAAGGGGACU<br>AAAACAUGC GCGACA UUCGAAGAA     |
| PF045_crLbu_nCoV_7   | crRNA    | Synthego | SARS-CoV-2 crRNA 7                                        | GACCACCCCAAAAAUGAAGGGGACU<br>AAAACUUGGUGUAUUAAGGCUC         |
| PF046_crLbu_nCoV_8   | crRNA    | Synthego | SARS-CoV-2 crRNA 8                                        | GACCACCCCAAAAAUGAAGGGGACU<br>AAAACGGAUUGCGGGUCCAAUGUG       |
| PF047_crLbu_nCoV_9   | crRNA    | Synthego | SARS-CoV-2 crRNA 9                                        | GACCACCCCAAAAAUGAAGGGGACU<br>AAAACUGUAGCAGAUUGCAGCAUU       |
| PF051_crLbu_nCoV_13  | crRNA    | Synthego | SARS-CoV-2 crRNA 10                                       | GACCACCCCAAAAAUGAAGGGGACU<br>AAAACUCUAGCAGGAGAAGUUC         |
| PF052_crLbu_nCoV_14  | crRNA    | Synthego | SARS-CoV-2 crRNA 11                                       | GACCACCCCAAAAAUGAAGGGGACU<br>AAAACUCUGUCAAGCAGCAGCAAAG      |
| PF084_crLbu_nCov15v2 | crRNA    | Synthego | SARS-CoV-2 crRNA 12                                       | GACCACCCCAAAAAUGAAGGGGACU<br>AAAACGACA UUUUGCUCUCAAGCUG     |
| PF088_crLbu_nCoV_19  | crRNA    | Synthego | SARS-CoV-2 crRNA 19                                       | GACCACCCCAAAAAUGAAGGGGACU<br>AAAACCUAUUAACUAUUAACGUACC      |
| PF089_crLbu_nCoV_20  | crRNA    | Synthego | SARS-CoV-2 crRNA 20                                       | GACCACCCCAAAAAUGAAGGGGACU<br>AAAACUAUUGCAGCAGUACGCACAC      |
| PF090_crLbu_nCoV_21  | crRNA    | Synthego | SARS-CoV-2 crRNA 21                                       | GACCACCCCAAAAAUGAAGGGGACU<br>AAAACAGCGCAGUAAGGAUGGCUAG      |
| PF091_crLbu_nCoV_22  | crRNA    | Synthego | SARS-CoV-2 crRNA 22                                       | GACCACCCCAAAAAUGAAGGGGACU<br>AAAACGUAACUAGCAAGAAUACCAC      |
| PF030_crLbu_NT1_L    | crRNA    | Synthego | Nontargeting crRNA                                        | GACCACCCCAAAAAUGAAGGGGACU<br>AAAACAGGUUCUUGACUACCGUAAU<br>U |
| PolyU reporter       | Reporter | IDT      | PolyU Reporter                                            | /56-FAM/rUrUrUrU/3IABkFQ/                                   |
| PF_019_T7NgeneL_F    | PCR      | Elim Bio | Forward primer for N gene block                           | CTTCCATGCCAATGCGCGAC                                        |
| PF_020_T7NgeneL_R    | PCR      | Elim Bio | Reverse primer for N gene block                           | TAATACGACTCACTATAG                                          |
| PF_051_M13T7_F       | PCR      | Elim Bio | Forward primer for IDT SARS-CoV-2 and MERS-CoV N gene PCR | TAATACGACTCACTATAGTAAAACGACGGCCAGT                          |
| PF_052_M13_R         | PCR      | Elim Bio | Reverse primer for IDT SARS-CoV-2 and MERS-CoV N gene PCR | CAGGAAACAGCTATGAC                                           |
| PF_039_nCoV_N5_F     | qPCR     | Elim Bio | Forward N gene primer for SARS-CoV-2 qPCR                 | AAATTTTGGGGACCAGGAAC                                        |
| PF_040_nCoV_N5_R     | qPCR     | Elim Bio | Reverse N gene primer for                                 | TGGCACCTGTGTAGGTCAAC                                        |

|                  |          |          |                                                        |                                                                                                                                                                                                                                                                                                                                                                                                                                                                                                                                                                                                                                                                                                                                                                                                                                                                                                                                                                                                                                                                                                                                                                         |
|------------------|----------|----------|--------------------------------------------------------|-------------------------------------------------------------------------------------------------------------------------------------------------------------------------------------------------------------------------------------------------------------------------------------------------------------------------------------------------------------------------------------------------------------------------------------------------------------------------------------------------------------------------------------------------------------------------------------------------------------------------------------------------------------------------------------------------------------------------------------------------------------------------------------------------------------------------------------------------------------------------------------------------------------------------------------------------------------------------------------------------------------------------------------------------------------------------------------------------------------------------------------------------------------------------|
|                  |          |          | SARS-CoV-2<br>qPCR                                     |                                                                                                                                                                                                                                                                                                                                                                                                                                                                                                                                                                                                                                                                                                                                                                                                                                                                                                                                                                                                                                                                                                                                                                         |
| PF_041_nCoV_N5_P | qPCR     | Elim Bio | N gene probe<br>for SARS-CoV-<br>2 qPCR                | FAM-ATGTCGCGCATTGGCATGGA-<br>BHQ1                                                                                                                                                                                                                                                                                                                                                                                                                                                                                                                                                                                                                                                                                                                                                                                                                                                                                                                                                                                                                                                                                                                                       |
| PF_042_nCoV_E_F  | qPCR/PCR | Elim Bio | Forward E gene<br>primer for<br>SARS-CoV-2<br>qPCR/PCR | ACAGGTACGTTAATAGTTAATAGCGT                                                                                                                                                                                                                                                                                                                                                                                                                                                                                                                                                                                                                                                                                                                                                                                                                                                                                                                                                                                                                                                                                                                                              |
| PF_043_nCoV_E_R  | qPCR/PCR | Elim Bio | Reverse E gene<br>primer for<br>SARS-CoV-2<br>qPCR/PCR | ATATTGCAGCAGTACGCACACA                                                                                                                                                                                                                                                                                                                                                                                                                                                                                                                                                                                                                                                                                                                                                                                                                                                                                                                                                                                                                                                                                                                                                  |
| PF_044_nCoV_E_P  | qPCR     | Elim Bio | E gene probe<br>for SARS-CoV-<br>2 qPCR                | FAM-<br>ACACTAGCCATCCTTACTGCGCTTCG-<br>BHQ1                                                                                                                                                                                                                                                                                                                                                                                                                                                                                                                                                                                                                                                                                                                                                                                                                                                                                                                                                                                                                                                                                                                             |
| N gene block     | gBlock   | IDT      | N gene IVT<br>Template                                 | CTTCCATGCCAATGCGCGACATTCCG<br>AAGAACGCTGAAGCGCTGGGGCAA<br>ATTGTGCAATTTGCGGCCAATGTTTG<br>TAATCAGTTCCTTGTCTGATTAGTTCC<br>TGGTCCCCAAAATTCCTTGGGTTTG<br>TTCTGGACCACGTCTGCCGAAAGCTT<br>GTGTTACATTGTATGCTTTAGTGGCA<br>GTACGTTTTTGCCGAGGCTTCTTAGA<br>AGCCTCAGCAGCAGATTTCTTAGTGA<br>CAGTTTGGCCTTGTGTTGTTGGCCT<br>TTACCAGACATTTTGCTCTCAAGCTG<br>GTTCAATCTGTCAAGCAGCAGCAAAG<br>CAAGAGCAGCATCACCGCCATTGCCA<br>GCCATTCTAGCAGGAGAAGTTCCCCT<br>ACTGCTGCCTGGAGTTGAATTTCTTG<br>AACTGTTGCGACTACGTGATGAGGAA<br>CGAGAAGAGGCTTGACTGCCGCCTC<br>TGCTCCCTTCTGCGTAGAAGCCTTTT<br>GGCAATGTTGTTCCCTGAGGAAGTTG<br>TAGCACGATTGCAGCATTGTTAGCAG<br>GATTGCGGGTGCCAATGTGATCTTTT<br>GGTGTATTCAAGGCTCCCTCAGTTGC<br>AACCCATATGATGCCGTCTTTGTTAG<br>CACCATAGGGAAGTCCAGCTTCTGGC<br>CCAGTTCTAGGTAGTAGAAATACCA<br>TCTTGGACTGAGATCTTTCATTTTACC<br>GTCACCACCACGAATTCGTCTGGTAG<br>CTCTTCGGTAGTAGCCAATTTGGTCA<br>TCTGGACTGCTATTGGTGTTAATTGG<br>AACGCCTTGCCTCGAGGGAATTTAA<br>GGTCTTCTTGCCATGTTGAGTGAGA<br>GCGGTGAACCAAGACGCAGTATTATT<br>GGGTAAACCTTGGGGCCGACGTTGT<br>TTTGATCGCGCCCCACTGCGTTCTCC<br>ATTCTGGTTACTGCCAGTTGAATCTG<br>AGGGTCCACCAAACGTAATGCGGGG<br>TGCATTTGCTGATTTTGGGGTCCAT<br>TATCAGACCTATAGTGAGTCGTATTA |
